# Supplementary material for: Chiral Derivatives of Xanthones: Investigation of the Effect of Enantioselectivity on Inhibition of Cyclooxygenases (COX-1 and COX-2) and Binding Interaction with Human Serum Albumin
Source: Pharmaceuticals (Basel). 2017 May 31;10(2):50. doi: 10.3390/ph10020050 (PMC5490407; doi:10.3390/ph10020050)
Supplement: Supplementary file 1 [file pharmaceuticals-10-00050-s001.docx]

**Supplementary Materials: Chiral Derivatives of Xanthones: Investigation of the Effect of Enantioselectivity on Inhibition of Cyclooxygenases (COX-1 and COX-2) and Binding Interaction with Human Serum Albumin**

Carla Fernandes 1,2, Andreia Palmeira 1,2, Inês I. Ramos 1, Carlos Carneiro 1, Carlos Afonso 1,2,
Maria Elizabeth Tiritan 1,2,3, Honorina Cidade 1,2, Paula C.A.G. Pinto 4, M. Lúcia M.F.S. Saraiva 4, Salette Reis 4 and Madalena M.M. Pinto 1,2,*

| 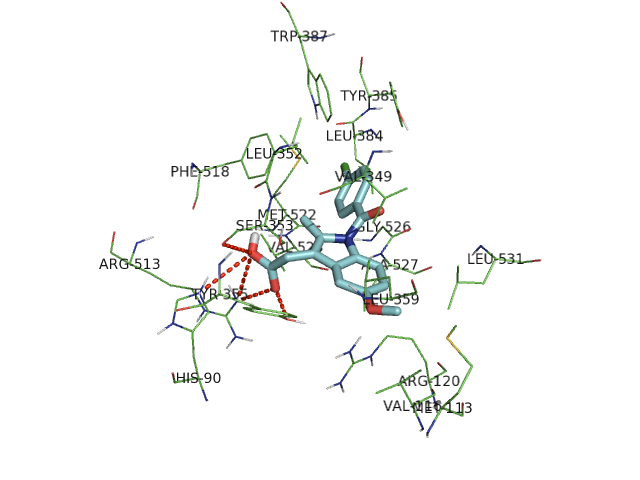  (**a**) | **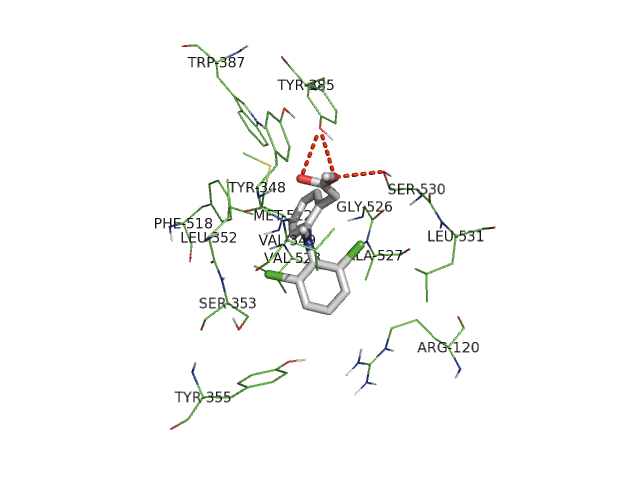**  (**b**) |
| --- | --- |
| **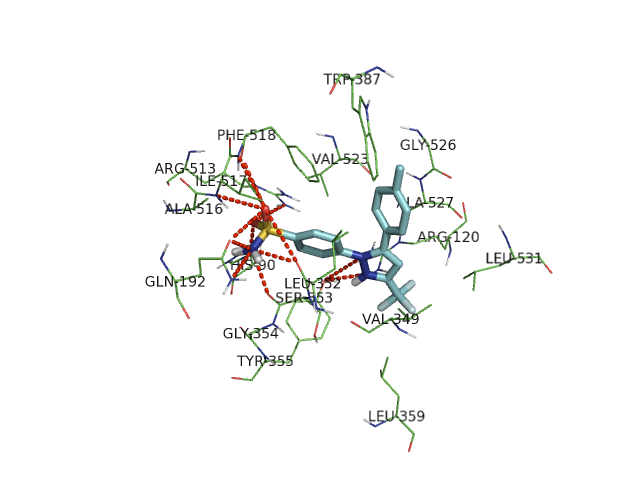**  (**c**) | **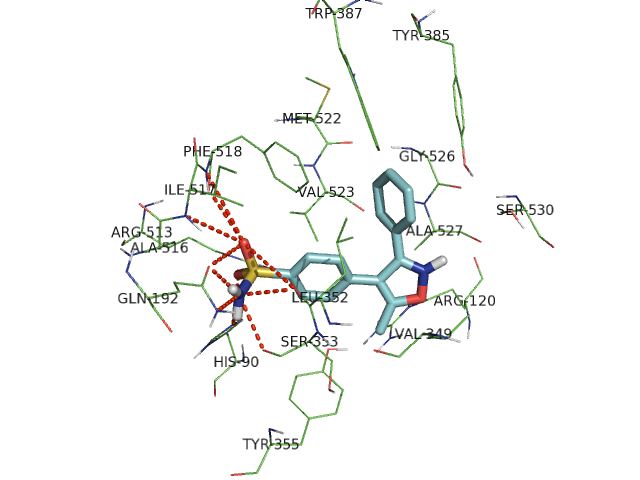**  (**d**) |

**Figure S1.** Hydrogen bonding interactions between COX-2 and (**a**) indomethacin, (**b**) diclofenac, (**c**) celecoxib and (**d**) valdecoxib.
